# Supplementary material for: Antifungal Potential of Azotobacter salinestris Strain Azt 31 against Phytopathogenic Fusarium spp. Associated with Cereals
Source: MDPI journal article supplement (doi:10.3390/jof8050473), 2022-04-30
Supplement: s1 [file s1]

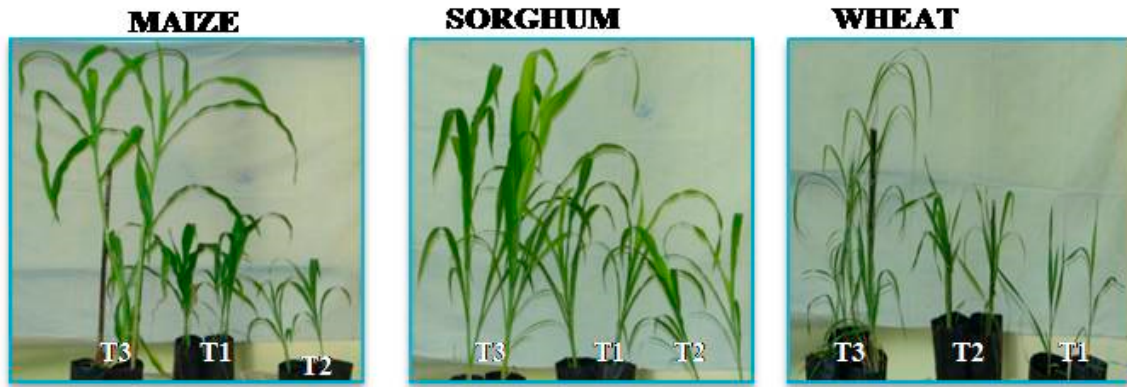

**Supplementary Figure S1: Pot experiment showing the effect of *A. salinestris* on shoot length of cereals. A) Maize, B) Sorghum, and C) Wheat.**

T1 is control; T2 is *F. sporotrichioides* alone; T3 is *A. salinestris* + *F. sporotrichioides*
